# Supplementary material for: Descriptive Sensory Attributes and Volatile Flavor Compounds of Plant-Based Meat Alternatives and Ground Beef
Source: MDPI journal article supplement (doi:10.3390/molecules28073151), 2023-03-31
Supplement: s1 [file s1]

**Table S1.** Definitions and standard references for descriptive beef flavor and texture attributes where 0 = extremely dry/tough/not detectable and 100 = extremely juicy/tender/intense, from Adhikari et al. (2011) and AMSA (2015).

| Attribute                | Definition                                                                                                                     | Reference                                                                                                                          |
|--------------------------|--------------------------------------------------------------------------------------------------------------------------------|------------------------------------------------------------------------------------------------------------------------------------|
| <i>Flavor Attributes</i> |                                                                                                                                |                                                                                                                                    |
| Beef Identity            | Amount of beef flavor in a sample                                                                                              | Swanson's Beef Broth = 30<br>80% Lean Ground Beef = 50<br>Beef brisket = 75                                                        |
| Bitter                   | The fundamental taste factor associated with a caffeine solution                                                               | 0.01% caffeine solution = 15<br>0.02% caffeine solution = 25                                                                       |
| Bloody/Serumy            | The aromatics associated with blood on cooked meat products.<br>Closely related to metallic                                    | USDA Choice Strip Steak<br>cooked to 60°C = 40                                                                                     |
| Brown                    | The flavor associated with grilled beef; caramelized.                                                                          | Beef suet = 60<br>Rare strip steak = low<br>Well done strip steak = high                                                           |
| Buttery                  | Sweet, dairy-like aromatic associated with natural butter.                                                                     | Land O' Lakes Unsalted<br>Butter tasted = 40                                                                                       |
| Fat-Like                 | The aromatics associated with cooked animal fat                                                                                | 90% Lean Ground Beef = 30<br>70% Lean Ground Beef = 60<br>Hillshire Farm's Lit'l<br>Smokies = 44                                   |
| Liver-like               | The aromatics associated with cooked organ meat/liver                                                                          | Flat iron steak = 20<br>Calf liver = 90                                                                                            |
| Metallic                 | The impression of slightly oxidized metals such as iron, copper,<br>and silver spoons                                          | 0.10% potassium chloride<br>solution = 10<br>USDA Choice Strip Steak<br>cooked to 60°C = 25<br>Dole Canned Pineapple Juice<br>= 38 |
| Musty/Earthy             | Musty, sweet, decaying vegetation                                                                                              | Mushroom = 20                                                                                                                      |
| Nutty                    | Nutty characteristics are: sweet, oily, light brown, slightly musty<br>and/or buttery, earthy, woody, astringent, bitter, etc. | Shelled Walnuts = 43                                                                                                               |
| Overall Sweet            | Combination of sweet taste and sweet aromatics; the aromatics<br>associated with the impression of sweet                       | Post Shredded Wheat = 10<br>Hillshire Farm's Beef Lit'l<br>Smokies = 20                                                            |
| Oxidized                 | The aromatics associated with oxidized fats and oils. These<br>aromatics may include cardboard, painty, varnish and fishy.     | Wesson vegetable oil<br>microwaved for 3 min<br>Wesson vegetable oil<br>microwaved for 5 min<br>80% Lean Ground Chuck =<br>67      |
| Roasted                  | The flavor associated with roasted beef.                                                                                       | Chuck Roast, Roasted = 45                                                                                                          |
| Smokey-Charcoal          | An aromatic associated with meat juices and fat dripping on hot<br>coats which can be acrid, sour, burned, etc.                | Wright's Natural Hickory<br>Seasoning in water = 60                                                                                |
| Salty                    | The fundamental taste factor associated with a sodium chloride<br>solution                                                     | 0.15% sodium chloride<br>solution = 10                                                                                             |

|                           |                                                                                                                    |                                             |
|---------------------------|--------------------------------------------------------------------------------------------------------------------|---------------------------------------------|
|                           |                                                                                                                    | 0.25% sodium chloride solution = 45         |
| Sour                      | The fundamental taste factor associated with citric acid.                                                          | 0.015% citric acid solution = 10            |
|                           |                                                                                                                    | 0.25% citric acid solution = 25             |
| Umami                     | Flat, salty, somewhat brothy. That taste of glutamate, salts of amino acids and other molecules called nucleotides | Unsalted beef broth = 30                    |
|                           |                                                                                                                    | 0.035% Accent Flavor Enhancer Solution = 50 |
| <i>Texture Attributes</i> |                                                                                                                    |                                             |
| Cohesiveness              | Amount which sample deforms rather than crumbles, cracks, or deforms.                                              | Corn Muffin = 6                             |
|                           |                                                                                                                    | Yellow American Cheese = 30                 |
|                           |                                                                                                                    | Soft Pretzel = 53                           |
|                           |                                                                                                                    | Starburst = 83                              |
| Hardness                  | Force required to achieve deformation of patty i.e., cut through with incisors or compress with molars.            | Cream cheese = 6                            |
|                           |                                                                                                                    | Yellow American Cheese = 30                 |
|                           |                                                                                                                    | Frankfurter = 46                            |
|                           |                                                                                                                    | Cocktail Peanuts = 60                       |
|                           |                                                                                                                    | Life Saver = 96                             |
| Particle Size             | Size of particles after 5 chews.                                                                                   | Small pearly tapioca = 26                   |
|                           |                                                                                                                    | Boba tea tapioca = 53                       |
| Juiciness                 | Amount of perceived juice released from patty during mastication.                                                  | Carrot = 56                                 |
|                           |                                                                                                                    | Mushroom = 66                               |
|                           |                                                                                                                    | Cucumber = 80                               |
|                           |                                                                                                                    | Apple = 90                                  |
|                           |                                                                                                                    | Watermelon = 100                            |

---

**Table S2.** Retention time, fragment ions, and odor descriptors of volatile compounds identified in three plant-based meat alternatives and two lean levels of ground beef.

| <b>Volatile Compound (ng/g)</b> | <b>Retention Time<sup>1</sup></b> | <b>Fragment Ions<sup>2</sup></b> | <b>Odor/Aroma Descriptor<sup>3</sup></b>       |
|---------------------------------|-----------------------------------|----------------------------------|------------------------------------------------|
| <i>Alcohols</i>                 |                                   |                                  |                                                |
| Ethanol                         | 2.32                              | 45, 46, 47                       | Medicinal, alcoholic                           |
| 1-Hexanol                       | 13.17                             | 56, 55, 69                       | Green, fruity, apple skin                      |
| 1-Octanol                       | 20.30                             | 55, 56, 84                       | Fatty, waxy, citrus, oily, walnut, chemical    |
| 1-Octen-3-ol                    | 17.22                             | 72, 83                           | Mushroom, earthy, fungal                       |
| 1-Pentanol                      | 9.57                              | 55, 57, 70                       | Fusel oil, balsamic, bread, fermented          |
| 1-Penten-3-ol                   | 6.33                              | 57, 41, 39                       | Bitter, mild green                             |
| 2,3-Butanediol                  | 9.54                              | 45, 43, 57                       | Creamy                                         |
| <i>Aldehydes</i>                |                                   |                                  |                                                |
| Decanal                         | 23.99                             | 57, 82, 112                      | Waxy, orange, citrus                           |
| Dodecanal                       | 26.50                             | 57, 82, 95                       | Soapy, waxy, citrus                            |
| Heptanal                        | 14.44                             | 96, 81, 55                       | Oily, fatty, rancid                            |
| Hexanal                         | 10.74                             | 56, 72, 82                       | Green, fatty, warmed-over, tallow              |
| Nonanal                         | 21.48                             | 96, 82, 114                      | Citrus, fatty, green, waxy                     |
| Octanal                         | 18.06                             | 84, 110, 100                     | Harsh, fatty, orange, soapy, green             |
| Pentanal                        | 7.26                              | 58, 55, 86                       | Almond, malt, pungent, acrid, winey, fermented |
| 2-Undecenal                     | 26.24                             | 70, 83, 57                       |                                                |
| (E,E)-2,4-Decadienal            | 25.44                             | 81, 152, 67                      | Deep fat, fried, chicken flavor at 10ppm       |
| <i>Carboxylic acids</i>         |                                   |                                  |                                                |
| Acetic acid                     | 4.69                              | 60, 45, 43                       | Sour, vinegar                                  |
| Butanoic acid                   | 9.64                              | 60, 73, 55                       | Sweaty, rancid                                 |
| Heptanoic acid                  | 19.63                             | 73, 87, 101                      | Cheesy, fruity, dirty                          |
| Nonanoic acid                   | 24.88                             | 129, 115, 73                     | Fatty, oily, nutty                             |
| Octanoic acid                   | 23.05                             | 73, 101, 115                     | Unpleasant, burning, rancid, fruity-acid, sour |
| <i>Esters</i>                   |                                   |                                  |                                                |
| Methyl butyrate                 | 7.98                              | 74, 57, 71                       | Apple, sweet, nutty, creamy                    |
| Methyl hexanoate                | 15.13                             | 74, 87, 99                       | Ether-like, caproic                            |
| Methyl nonanoate                | 23.91                             | 74, 87, 141                      | Wine, coconut, sweet                           |
| Methyl octanoate                | 21.89                             | 74, 87, 127                      | Winey, fruity, orange, oily                    |
| Methyl propionate               | 4.90                              | 57, 59, 80                       | Fruity, rum, sweet                             |
| <i>Furans</i>                   |                                   |                                  |                                                |
| Furfural                        | 12.06                             | 95, 96, 67                       | Brown, sweet, woody, bready, nutty, caramellic |
| 2-Furan methanol                | 12.83                             | 98, 81, 69                       | Warm, oily, burnt, cooked sugar                |
| 2-Pentyl furan                  | 17.63                             | 81, 91, 53                       | Green bean, butter, caramel                    |
| 2-Methyl-3-furanthiol           | 13.40                             | 114, 85, 71                      | Meaty, roasted meat, boiled meat               |
| 5-Methyl furfural               | 17.22                             | 110, 109, 53                     | Sweet, spiced, caramel-like                    |
| <i>Hydrocarbons</i>             |                                   |                                  |                                                |

|                                |       |               |                                            |
|--------------------------------|-------|---------------|--------------------------------------------|
| Benzene                        | 6.40  | 78, 79, 77    | Pleasant, distinct                         |
| Decane                         | 17.84 | 57, 71, 142   | -                                          |
| Ethylbenzene                   | 13.18 | 106, 91, 77   | -                                          |
| Nonane                         | 14.39 | 57, 85, 71    | -                                          |
| Octane                         | 10.66 | 114, 85, 43   | -                                          |
| Styrene                        | 13.18 | 106, 91, 105  | Sweet                                      |
| Tetradecane                    | 25.34 | 57, 71, 85    | Alkane                                     |
| Toluene                        | 9.75  | 92, 91, 65    | Gasoline, paint thinner                    |
| p-Xylene                       | 14.38 | 91, 106, 105  | -                                          |
| 1-Octene                       | 9.57  | 70, 83, 112   | -                                          |
| <i>Ketones</i>                 |       |               |                                            |
| Acetoin                        | 7.76  | 88, 73, 55    | Buttery, creamy, fresh                     |
| 2,3-Butanedione                | 4.42  | 86, 87, 56    | Buttery                                    |
| 2-Butanone                     | 4.56  | 72, 57, 43    | Chemical, fruity-green                     |
| 2-Heptanone                    | 13.94 | 58, 71, 114   | Fruity, spicy, cinnamon, cheesy            |
| 2-Pentanone                    | 6.91  | 86, 71, 58    | Sweet, fruity, banana                      |
| 2-Propanone                    | 2.87  | 43, 58, 42    | Pungent, acetone, chemical, earthy         |
| <i>Lactones</i>                |       |               |                                            |
| Butyrolactone                  | 15.03 | 85, 56, 55    | Milky, creamy                              |
| <i>Oxolanes</i>                |       |               |                                            |
| 2-Methyltetrahydro-3-furanone  | 11.16 | 100, 72, 43   | Coffee, bready                             |
| <i>Pyrazines</i>               |       |               |                                            |
| Methylpyrazine                 | 11.85 | 94, 67, 53    | Nutty, chocolate, roasted                  |
| Trimethylpyrazine              |       | 122, 81, 54   | Musty, potato, roasted, earthy             |
| 2,5-Dimethylpyrazine           | 15.05 | 108, 81       | Musty, potato, cocoa, baked, meaty         |
| 2-Ethyl-3,5/6-dimethylpyrazine | 20.50 | 135, 136, 108 | Roasted nuts, coffee, chocolate, roasted   |
| <i>Pyrroles</i>                |       |               |                                            |
| 2-Acetylpyrrole                | 20.32 | 94, 109, 66   | Bread, walnut, licorice                    |
| <i>Strecker Aldehydes</i>      |       |               |                                            |
| Acetaldehyde                   | 2.07  | 44, 43, 45    | Fresh, green                               |
| Benzaldehyde                   | 17.02 | 106, 77, 51   | Almond oil, nutty, woody                   |
| Butyraldehyde                  | 4.55  | 72, 76, 57    | Musty, fusel, bready, yeasty               |
| Methional                      | 14.78 | 104, 48, 76   | Roasted, chocolate, potato                 |
| Phenylacetaldehyde             | 19.81 | 91, 92, 65    | Rosy, floral                               |
| 2-Methylbutanal                | 6.33  | 57, 86, 71    | Malty, green, musty, fruity, brothy, meaty |
| 3-Methylbutanal                | 6.14  | 86, 71, 58    | Malty, brothy, meaty                       |
| <i>Sulfides</i>                |       |               |                                            |
| Carbon disulfide               | 3.63  | 76, 77, 88    | Cabbage, sulfurous                         |
| Diallyl sulfide                | 13.21 | 45, 73, 114   | Garlic, alliaceous                         |
| Dimethyl disulfide             | 8.51  | 94, 79, 45    | Onion, sulfurous, unpleasant               |
| Dimethyl sulfide               | 3.27  | 62, 47, 45    | Asparagus, putrid                          |
| Furfuryl sulfide               | 26.50 | 194, 81, 53   | Cooked onion/garlic, pungent               |

|                  |       |             |                           |
|------------------|-------|-------------|---------------------------|
| <i>Terpenes</i>  |       |             |                           |
| $\alpha$ -Pinene | 15.89 | 93, 91, 92  | Piney, citrus, turpentine |
| d-Limonene       | 19.23 | 68, 93, 136 | Lemon, citrus, fresh      |

|               |      |            |                                                   |
|---------------|------|------------|---------------------------------------------------|
| <i>Thiols</i> |      |            |                                                   |
| Methanethiol  | 2.32 | 48, 47, 45 | Vegetable oil, alliaceous, eggy, creamy, sulfuric |

|                    |       |            |              |
|--------------------|-------|------------|--------------|
| <i>Thiophenes</i>  |       |            |              |
| 3-Methyl thiophene | 10.40 | 97, 98, 45 | Sweet, meaty |

---

<sup>1</sup> Retention time of a volatile compound eluting through a VF5-ms column; <sup>2</sup> Ions produced at 70 eV electron ionization; <sup>3</sup> Reported odor/aroma descriptor in the literature [3,8,9,10,20,29,30].
